# Supplementary material for: Hydrogels from chrome shavings for a highly sensitive capacitive pressure sensor
Source: Royal Society of Chemistry journal article supplement (doi:10.1039/d4ta00702f), 2024-01-01
Supplement: d4ta00702f1.pdf [file d4ta00702f1.pdf]

## Supplementary Information

### Hydrogel from Chrome Shavings for a Highly Sensitive Capacitive Pressure Sensor

Hua Yuan,<sup>ab</sup> Manting Wang,<sup>ab</sup> Jiaqi Zhang,<sup>ab</sup> Jiexin Wang<sup>ab</sup> and Yuan Le<sup>\*ab</sup>

<sup>a</sup>State Key Laboratory of Organic-Inorganic Composites, Beijing University of  
Chemical Technology, Beijing 100029, PR China.

<sup>b</sup>Research Center of the Ministry of Education for High Gravity Engineering and  
Technology, Beijing University of Chemical Technology, Beijing 100029, PR China.

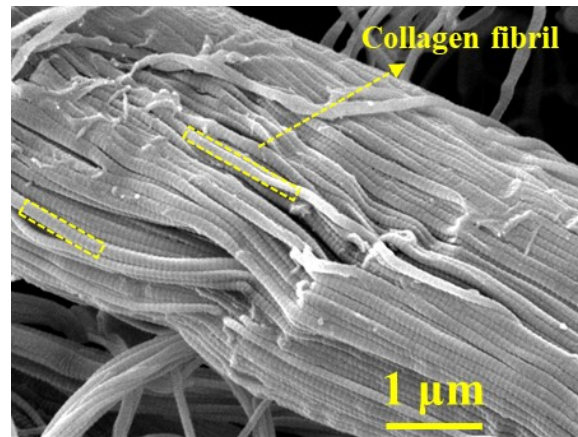

Fig. S1. SEM image of collagen fiber.

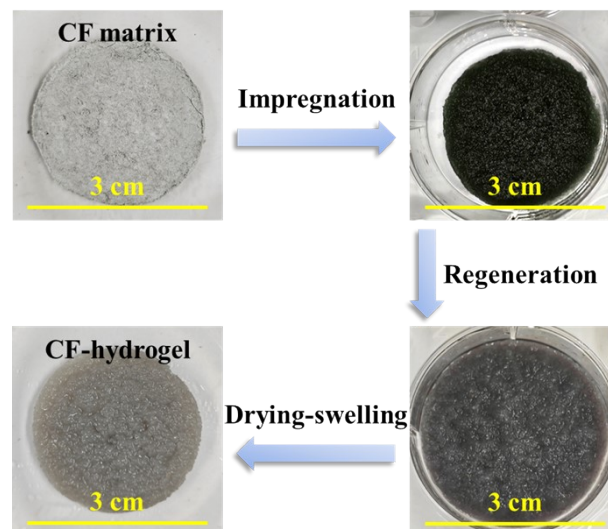

Fig. S2. Digital images at each stage in the CF-hydrogel conversion.

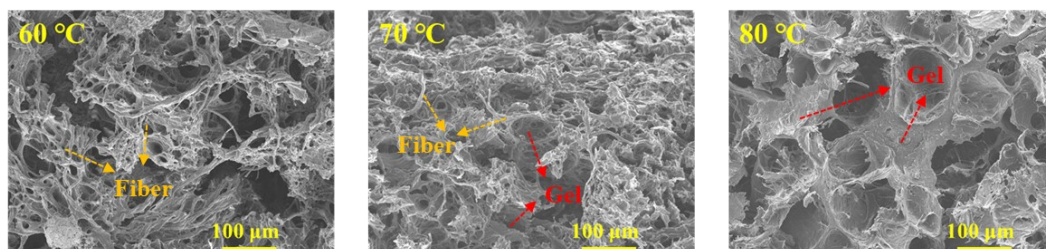

Fig. S3. SEM images of the cross-section of CF-hydrogels with different immersion temperatures.

Table S1. Sensitivities of CF-hydrogels with different immersion temperatures.

|       | I                                     | II                                      | III                                      |
|-------|---------------------------------------|-----------------------------------------|------------------------------------------|
| 60 °C | 3.27 kPa <sup>-1</sup><br>(0-0.8 kPa) | 0.91 kPa <sup>-1</sup><br>(0.8-2.3 kPa) | 0.19 kPa <sup>-1</sup><br>(2.3-9.52 kPa) |
| 70 °C | 5.2 kPa <sup>-1</sup><br>(0-0.6 kPa)  | 1.2 kPa <sup>-1</sup><br>(0.6-2.4 kPa)  | 0.34 kPa <sup>-1</sup><br>(2.4-9.84 kPa) |
| 80 °C | 1.69 kPa <sup>-1</sup><br>(0-0.5 kPa) | 0.67 kPa <sup>-1</sup><br>(0.5-1.5 kPa) | 0.21 kPa <sup>-1</sup><br>(1.5-6.76 kPa) |

Table S2. Sensitivities of CF-hydrogels with different NaCl concentrations.

|        | I                                     | II                                      | III                                      |
|--------|---------------------------------------|-----------------------------------------|------------------------------------------|
| 0 wt%  | 5.2 kPa <sup>-1</sup><br>(0-0.6 kPa)  | 1.2 kPa <sup>-1</sup><br>(0.6-2.4 kPa)  | 0.34 kPa <sup>-1</sup><br>(2.4-9.84 kPa) |
| 5 wt%  | 6.01 kPa <sup>-1</sup><br>(0-0.9 kPa) | 1.62 kPa <sup>-1</sup><br>(0.9-3 kPa)   | 1.22 kPa <sup>-1</sup><br>(3-8.95 kPa)   |
| 10 wt% | 3.14 kPa <sup>-1</sup><br>(0-1.1 kPa) | 1.42 kPa <sup>-1</sup><br>(1.1-3.2 kPa) | 1.01 kPa <sup>-1</sup><br>(3.2-8.39 kPa) |

Table S3. Elemental analysis of CF-hydrogels with different NaCl concentrations.

| Atomic % | C     | O     | N     | Na   | Cl   |
|----------|-------|-------|-------|------|------|
| 0 wt%    | 53.73 | 27.06 | 19.21 | -    | -    |
| 5 wt%    | 64.71 | 19.34 | 13.31 | 1.85 | 0.78 |
| 10 wt%   | 63.62 | 17.42 | 15.08 | 2.68 | 1.20 |

Table S4. Sensitivities of this work and previously reported results.

|           | Sensitivity                                                                                                  |
|-----------|--------------------------------------------------------------------------------------------------------------|
| Ref 15    | 2.33 kPa <sup>-1</sup> (0-3 kPa), 0.33 kPa <sup>-1</sup> (3-10 kPa)                                          |
| Ref 16    | 3.19 kPa <sup>-1</sup> (0-0.5 kPa), 0.81 kPa <sup>-1</sup> (0.5-3 kPa), 0.15 kPa <sup>-1</sup> (3-5 kPa)     |
| Ref 17    | 0.91 kPa <sup>-1</sup> (0-2 kPa)                                                                             |
| Ref 34    | 0.19 kPa <sup>-1</sup> (0-1.5 kPa), 0.02 kPa <sup>-1</sup> (1.5-5 kPa)                                       |
| Ref 35    | 2.17 kPa <sup>-1</sup> (0-4.5 kPa), 0.54 kPa <sup>-1</sup> (4.5-7.5 kPa)                                     |
| Ref 36    | 0.898 kPa <sup>-1</sup> (0-3 kPa)                                                                            |
| Ref 37    | 0.77 kPa <sup>-1</sup> (0-1.8 kPa), 0.12 kPa <sup>-1</sup> (1.8-7 kPa)                                       |
| Ref 38    | 0.293 kPa <sup>-1</sup> (0-1.5 kPa), 0.227 kPa <sup>-1</sup> (1.5-5 kPa)                                     |
| Ref 39    | 0.22 kPa <sup>-1</sup> (0-1.4 kPa), 0.13 kPa <sup>-1</sup> (1.4-4.7 kPa), 0.07 kPa <sup>-1</sup> (4.7-8 kPa) |
| Ref 40    | 0.03 kPa <sup>-1</sup> (0-2.45 kPa)                                                                          |
| This work | 6.01 kPa <sup>-1</sup> (0-0.9 kPa), 1.62 kPa <sup>-1</sup> (0.9-3 kPa), 1.22 kPa <sup>-1</sup> (3-8.95 kPa)  |

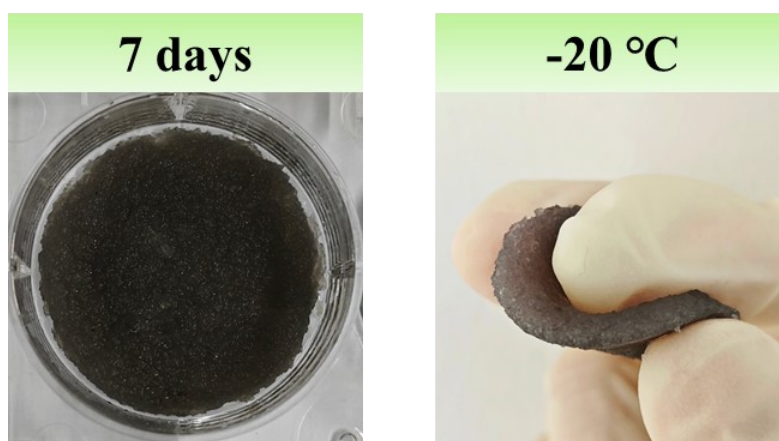

Fig. S4. Digital images of CF-organohydrogel after 7 days and CF-organohydrogel at -20 °C.
